# Supplementary material for: Perforin Gene Transfer Into Hematopoietic Stem Cells Improves Immune Dysregulation in Murine Models of Perforin Deficiency
Source: PubMed Central journal article supplement (PMC4395774; doi:10.1038/mt.2014.242), 2015-01-20

**1 Supplementary Material**

2

**3 Supplementary Materials and Methods**

4 **Vector construction:** SIN lentiviral vectors (LV) incorporating the perforin cDNA were  
5 constructed using the HIV-1 vector backbone and a modified woodchuck post

6 translational regulatory element (WPRE) as described previously<sup>1</sup>. The native human

7 perforin gene was obtained by PCR amplification of cDNA using the following primers:

8 5' perforin Age: GCACCGGTGCCACCATGGCAGCCCGTCTGCTCCTCCT and 3' perforin Xho:

9 TGCTCGAGTCACCACACGGCCCCACTCCGGTT with restriction sites underlined and then

10 cloned into a pRRL backbone containing the human phosphoglycerate kinase promoter

11 (PGK). The perforin gene and the PGK promoter were cloned from the pRRL.PGK.PRF

12 into a pHR'SINcPPT.SEW.SFFV.IRES.GFP backbone containing the internal ribosomal

13 entry site (IRES) and GFP after the removal of the SFFV promoter sequence to create

14 pPGK.PRF.I.GFP. The human perforin promoter was obtained by PCR amplification of a

15 ~1.6Kb human DNA region using the following primers: PRF Nhe 5'-

16 CAGCTAGCGAATTCCAAAGTCCTCTCTTTGATTTTAT-3' and PRF Age 5'-

17 GCACCGGTGGCATCAGCCCCCAGGCAGCCCACT-3' with restriction sites underlined, and

18 then cloned into a pRRL backbone from which it was removed together with the

19 perforin cDNA into a pHR'SINcPPT.SEW.IRES.GFP backbone to create pPRF.PRF.I.GFP. A

20 vector containing a non-functional mutated version of the perforin gene (PRFmut) was

21 also constructed. This was done by cloning a perforin sequence with a missense

22 mutation (PRF-T435M)<sup>2</sup> under the control of the PGK promoter to create

23 pPGK.PRFmut.I.GFP.

24 **Production of lentiviral particles and titration:** Lentiviral supernatants were

25 produced by transient co transfection of vector plasmid, envelope plasmid and

26 packaging plasmids into 293T cells in the presence of polyethylamine (Sigma Aldrich,

27 Dorset, UK). The VSV-G envelope plasmid (pMD.G2) and second-generation packaging

28 plasmid (pCMVΔ8.91) were produced by Plasmid Factory (Bielfield, Germany). The viral  
29 supernatants were concentrated by ultracentrifugation at 98,000g for 2hr at 4°C. The  
30 viral titer was determined by transducing RBL-1 cells with serial dilutions of the viruses.  
31 The expression was monitored by flow cytometry detecting GFP.

32 **Cell lines:** RBL-1 and 293T cell lines were maintained in Dulbecco's modified Eagle's  
33 medium (Invitrogen, Paisley, UK). RMA-S, P815, Jurkat, U937, K562, LCL cell lines were  
34 cultured in RPMI 1640 medium (Roswell Park Memorial Institute medium, Invitrogen).  
35 All media were supplemented with 10% fetal bovine serum (FBS) and 100U/ml  
36 penicillin/streptomycin (Invitrogen).

37 **Western blot analysis and confocal staining:** Cell lysates from transduced RBL cells  
38 were resolved on a 10% sodium dodecyl sulfate–polyacrylamide gel electrophoresis  
39 (SDSPAGE;Tris-Glycine) gel under non reducing conditions, which was then analyzed for  
40 perforin or actin expression by immunoblotting with anti-perforin antibody 2d4 (kindly  
41 provided by Dr. Griffiths) or anti-actin antibody (Sigma), followed by the secondary  
42 horseradish peroxidase–linked anti–mouse or anti–rabbit immunoglobulin (Sigma). The  
43 signal was detected by chemiluminescence (Amersham Biosciences, Little Chalfont, UK).

44 Transduced RBL-1 cells were plated on glass coverslips coated with poly-L-lysine  
45 (Sigma) and incubated 1h at 37°C. Cells were fixed by incubation in 4%  
46 paraformaldehyde for 10min. The cells were incubated with anti perforin 1 (H-315,  
47 Santa Cruz) in permeabilizing buffer (PBS with 0.01% triton) for 1h and with secondary  
48 antibody PE-Cy7 anti rabbit (Sigma) for 30min, washed and mounted on slides with  
49 antifading medium. Samples were observed with a Zeiss LSM710 inverted confocal  
50 microscope.

51 **Real-time qPCR:** Genomic DNA was isolated from cells using the DNAeasy extraction kit  
52 (Qiagen, West Sussex, UK). Average vector copy number per cell was determined by  
53 WPRE quantitative PCR in Platinum Quantitative PCR Supermix-UDG with Rox

54 (Invitrogen). The titin gene was used as an endogenous gene control. The primer and  
55 probe sequences for mutant WPRE were as follows: forward, 5'-TGGATTCTGCGCGGGA-  
56 3'; and reverse, 5'-GAAGGAAGGTCCGCTGGATT-3'; probe, 5'-  
57 FAM\_CTTCTGCTACGTCCCTTCGGCCCT\_TAMRA-3'. The primer and probe sequences for  
58 titin were as follows: forward, 5'-AAAACGAGCAGTGACCTGAGG-3'; and reverse, 5'-  
59 TTCAGTCATGCTGCTAGCGC-3'; probe, 5'-FAM\_TGCACGGAATCTCGTCTCAGTC\_TAMRA-  
60 3'.

61 **Immunophenotyping by flow cytometry:** Flow cytometric analyses were performed  
62 on cells obtained from blood, bone marrow, thymus and spleen. Blood was lysed and  
63 leukocytes were washed with PBS. Cells were incubated for 30 minutes at room  
64 temperature in PBS containing 0.5% BSA and antibodies against CD4, CD8, NK1.1 or  
65 B220 directly conjugated with APC (all BD Biosciences). Subsequently cells were  
66 washed and measured on a CyAn™ ADP Flow Cytometer (Dako, Carpinteria, CA). Spleen  
67 and thymus cells were evaluated similarly. Additionally GFP expression was measured  
68 in mice treated with the PGK.GFP, PGK.PRF, PGK.PRFmut and PRF.PRF.

69 **Determination of perforin expression:** For intracellular perforin staining,  $1 \times 10^6$  cells  
70 were fixed with 1% PFA in PBS for 20 min at room temperature and incubated 10 min  
71 with BD perm/wash buffer 1X (BD Biosciences). Cells were washed 2 times with BD  
72 perm/wash buffer 1X and then stained with PE-conjugated mouse anti-human perforin  
73 mAb ( $\delta$ G9, IgG2b; BD Biosciences) in BD perm/wash buffer 1X for 30 min at room  
74 temperature. Unbound antibodies were removed by washing with perm/wash buffer  
75 1X and fixed again with 1% PFA. At least 25,000 cells were analyzed for each sample by  
76 flow cytometry.

77

78

79 **Supplementary references**

- 80 1. Demaison C, Parsley K, Brouns G, Scherr M, Battmer K, Kinnon C, et al.  
81 High-level transduction and gene expression in hematopoietic repopulating cells  
82 using a human immunodeficiency [correction of imunodeficiency] virus type 1-  
83 based lentiviral vector containing an internal spleen focus forming virus  
84 promoter. *Hum Gene Ther* 2002;13(7):803-13.
- 85 2. Urrea Moreno R, Gil J, Rodriguez-Sainz C, Cela E, LaFay V, Oloizia B, et al.  
86 Functional assessment of perforin C2 domain mutations illustrates the critical  
87 role for calcium-dependent lipid binding in perforin cytotoxic function. *Blood*  
88 2009;113(2):338-46.
- 89

90 **Supplementary Figure legends**

91

92 **Supplementary Figure S1: GFP expression in different cell lines after transduction**

93 **with PGK.PRF and PRF.PRF.** The different cell lines were transduced with the vectors  
94 at an MOI of 50 and GFP and PRF expression were observed by FACS after 5 days. The  
95 values observed are normalized to the copy number. U937 is a monocytic cell line, LCL is  
96 a B lymphocytic cell line, 293T is an embryonic kidney cell line, K562 is a myeloid cell  
97 line, Jurkat is a T cell line and YT is a NK cell line.

98

99 **Supplementary Figure S2: Perforin expression and function in RBL-1 cells (a)**

100 Detection of perforin in YT cells as well as in RBL-1 cells transduced with PGK.PRF by  
101 western blotting following non-reducing SDS-PAGE. All forms of perforin were  
102 visualized in the 2 cell lines by anti-prf 2d4 antibody. The negative control is non-  
103 transduced RBL-1 cells. (b) Visualization of perforin by confocal microscopy in RBL-1  
104 cells transduced with PGK.PRF and in normal YT cells. Perforin staining is shown in  
105 white.

106

107 **Supplementary Figure S3: Lineage development in reconstituted mice is not**

108 **affected by progenitor cell gene transfer.** Percentage of T cells, NK cells, B cells and  
109 GR1 cells in the spleen, thymus, and blood of *prf*<sup>-/-</sup> mice reconstituted with LSK cells  
110 transduced with PGK.GFP, PGK.PRF and PRF.PRF, *prf*<sup>-/-</sup> mice non reconstituted and WT  
111 mice.

112

113 **Supplementary Figure S4: Transgene expression in different organs following**

114 **progenitor cell gene transfer.** GFP and perforin expression in bone marrow, thymus,  
115 blood, spleen and spleen derived and stimulated CD8<sup>+</sup> T cells and NK cells from *prf*<sup>-/-</sup>  
116 mice reconstituted with LSK cells transduced with (a) PGK.PRF and (b) PRF.PRF.

117 **Supplementary Figure S5: Lentiviral vector mediated HSC perforin gene transfer**  
118 **restores T and NK cell cytotoxic function and reduces IFN- $\gamma$  secretion by T**  
119 **lymphoblasts *in vitro*- experiment 1.** (a)  $^{51}\text{Cr}$  release from RMA-S cells co-incubated  
120 with NK cells from mice reconstituted with LSK cells transduced with PGK.GFP, PGK.PRF  
121 and PRF.PRF, *prf*<sup>-/-</sup> and WT mice. (b)  $^{51}\text{Cr}$  release from anti-CD3 bound P815 cells co-  
122 incubated with CD8<sup>+</sup> T cells from mice reconstituted with LSK cells transduced with  
123 PGK.GFP, PGK.PRF and PRF.PRF, *prf*<sup>-/-</sup> and WT mice. The p values correspond to both the  
124 comparisons between the PGK.PRF and the PRF.PRF groups with the PGK.GFP group.  
125 The highest p value is shown for each point. (c) IFN- $\gamma$  production by CD8<sup>+</sup> lymphoblasts  
126 derived from *prf*<sup>-/-</sup> mice reconstituted with LSK cells transduced with PGK.GFP, PGK.PRF  
127 and PRF.PRF, from *prf*<sup>-/-</sup> and from WT mice after co-incubation with anti-CD3 bound  
128 P815 cells for 4 hours. For the 3 assays n=3 for each group and the error bars represent  
129 the SD.

130

131 **Supplementary Figure S6: Lentiviral vector mediated HSC perforin gene transfer**  
132 **restores T and NK cell cytotoxic function and reduces IFN- $\gamma$  secretion by T**  
133 **lymphoblasts *in vitro*- experiment 3.** (a)  $^{51}\text{Cr}$  release from RMA-S cells co-incubated  
134 with NK cells from mice reconstituted with LSK cells transduced with PGK.GFP, PGK.PRF  
135 and PRF.PRF, *prf*<sup>-/-</sup> and WT mice. (b)  $^{51}\text{Cr}$  release from anti-CD3 bound P815 cells co-  
136 incubated with CD8<sup>+</sup> T cells from mice reconstituted with LSK cells transduced with  
137 PGK.GFP, PGK.PRF and PRF.PRF, *prf*<sup>-/-</sup> and WT mice. The p values correspond to both the  
138 comparisons between the PGK.PRF and the PRF.PRF groups with the PGK.GFP group.  
139 The highest p value is shown for each point. (c) IFN- $\gamma$  production by CD8<sup>+</sup> lymphoblasts  
140 derived from *prf*<sup>-/-</sup> mice reconstituted with LSK cells transduced with PGK.GFP, PGK.PRF  
141 and PRF.PRF, from *prf*<sup>-/-</sup> and from WT mice after co-incubation with anti-CD3 bound  
142 P815 cells for 4 hours. For the 3 assays n=3 for each group and the error bars represent  
143 the SD.

## Supplementary Figure S1

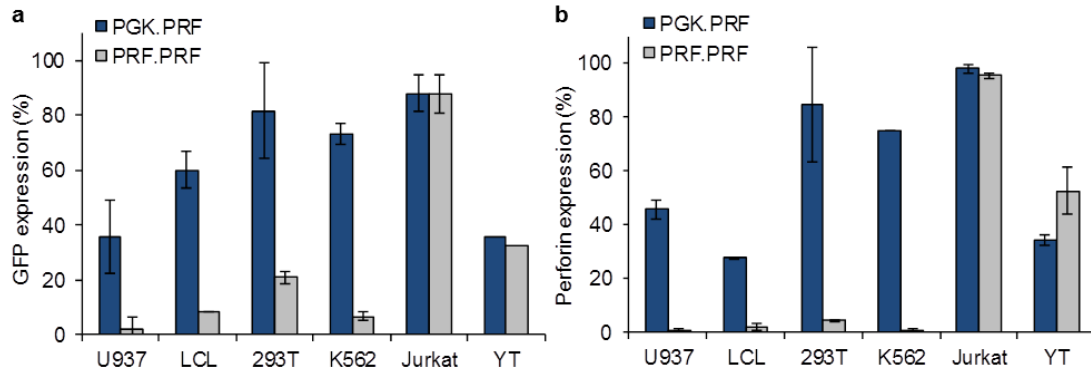

## Supplementary Figure S2

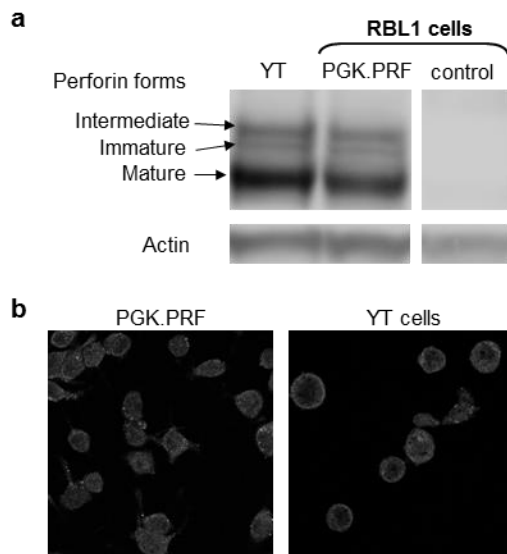



**Supplementary Figure S3**

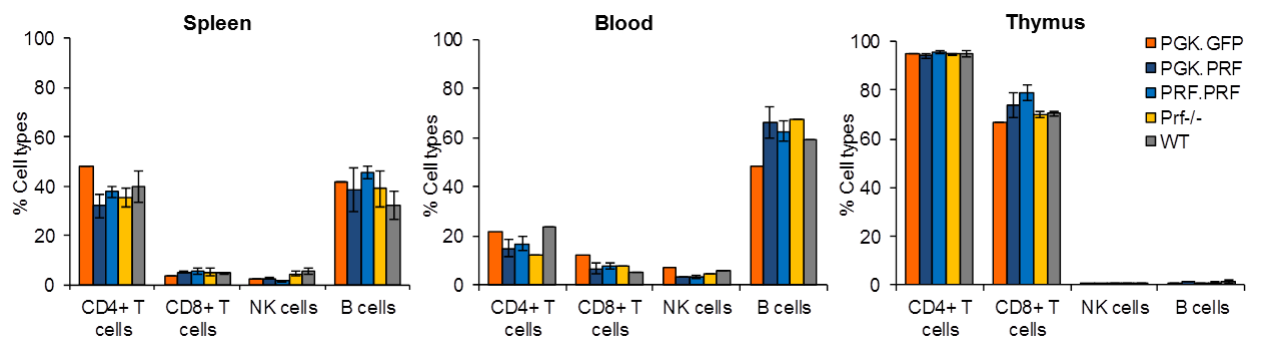

## Supplementary Figure S4

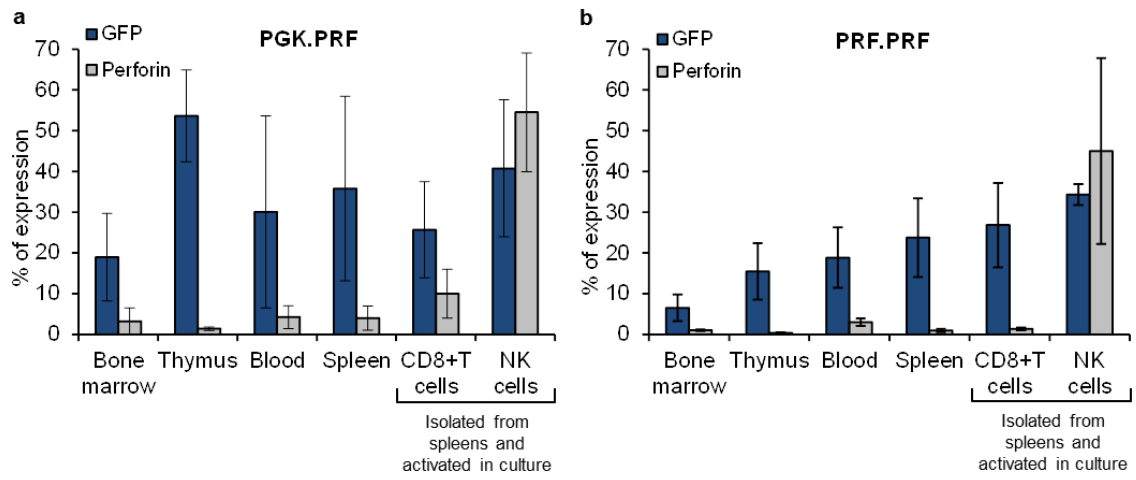

## Supplementary Figure S5

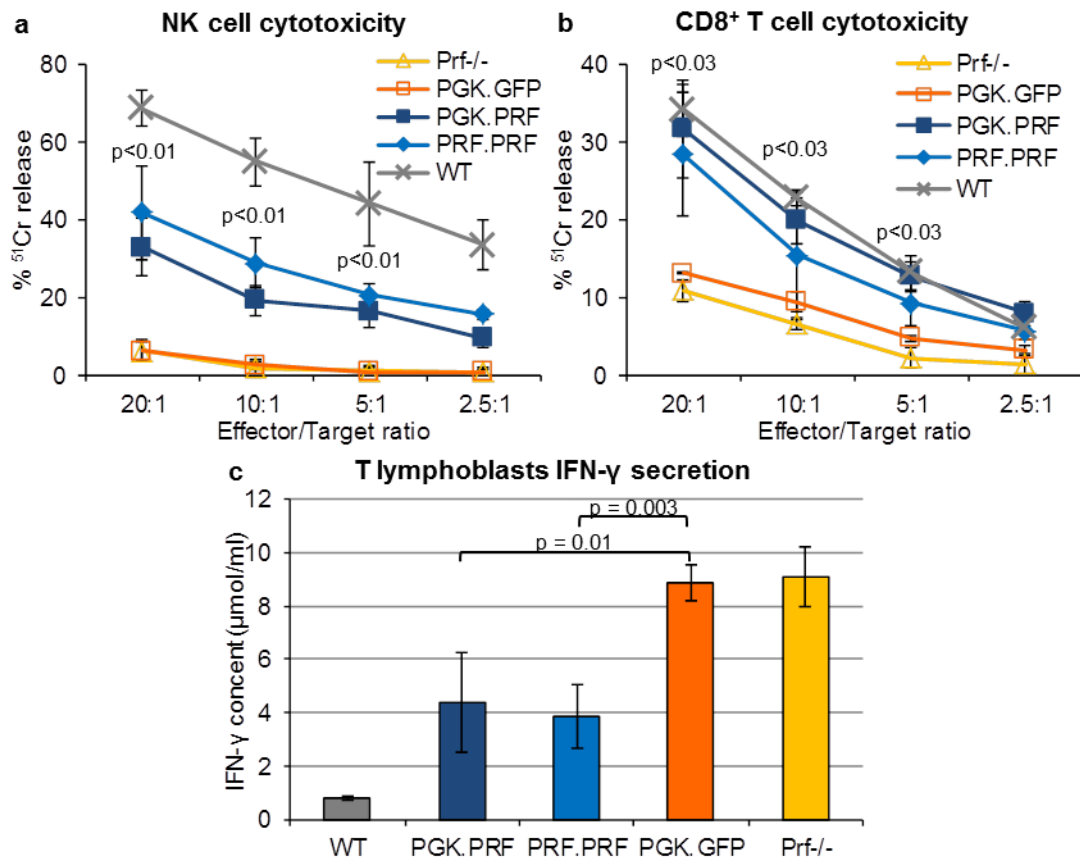

## Supplementary Figure S6

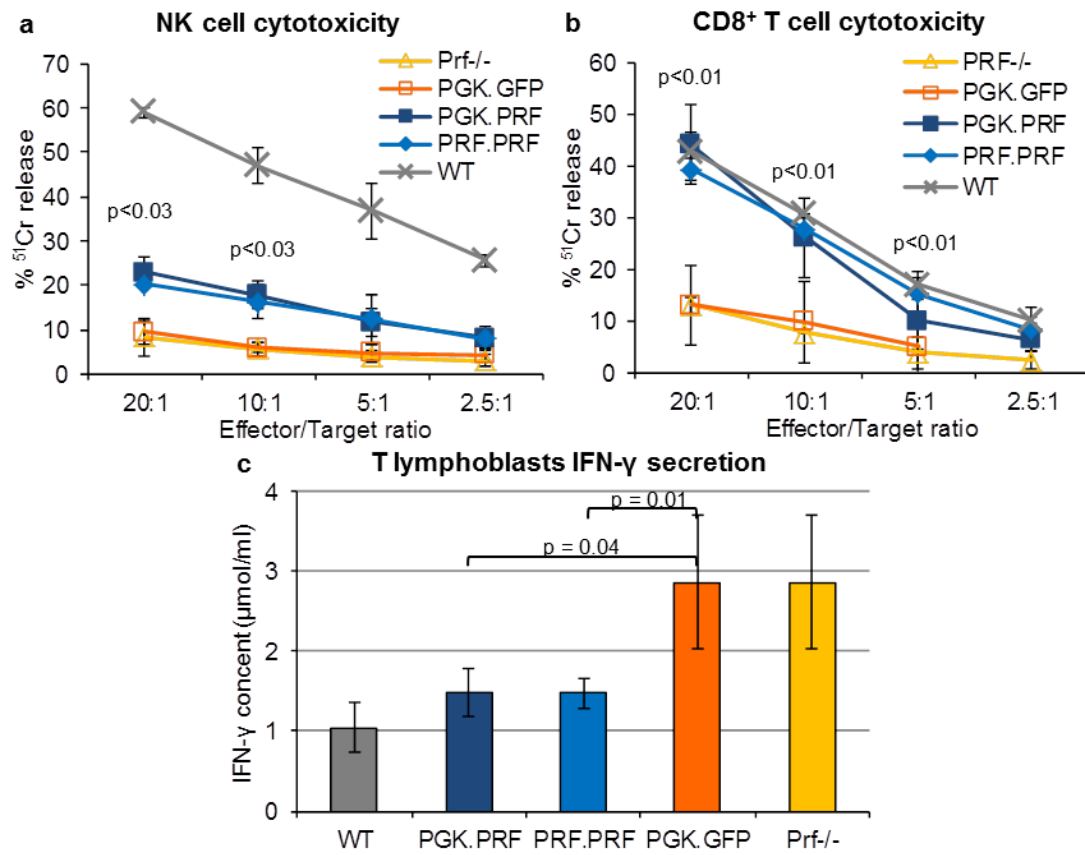

Supplement: mt2014242x1.pdf [file mt2014242x1.pdf]
